# Supplementary material for: Age-Related Mitochondrial Impairment and Renal Injury Is Ameliorated by Sulforaphane via Activation of Transcription Factor NRF2
Source: MDPI journal article supplement (doi:10.3390/antiox11010156), 2022-01-14
Supplement: s1 [file s1]

**Table S1. List of antibodies used in the study.**

| <b>S.no</b> | <b>Name of the Antibody</b> | <b>Catalog Number &amp; Source</b> | <b>Dilution</b>             | <b>Company</b>              |
|-------------|-----------------------------|------------------------------------|-----------------------------|-----------------------------|
| 1           | NRF2                        | 16396-1-AP, rabbit polyclonal      | 1:500 (JESS)<br>1:1000 (WB) | ProteinTech                 |
| 2           | KEAP1                       | sc-365626<br>mouse monoclonal      | 1:1000 (WB)                 | Santa Cruz<br>Biotechnology |
| 3           | Hemeoxygenase 1             | ab13243<br>rabbit polyclonal       | 1:1000 (WB)                 | Abcam                       |
| 4           | TFAM                        | 22586-1-AP<br>rabbit polyclonal    | 1:1000 (WB)                 | Protein Tech                |
| 5           | ATP5B                       | ab14730<br>mouse monoclonal        | 1:1000 (WB)                 | Abcam                       |
| 6           | OXPHOS<br>antibody cocktail | MS 604-300<br>mouse monoclonal     | 1:1000 (WB)                 | Abcam                       |
| 7           | Collagen IV                 | ab6586<br>rabbit polyclonal        | 1:200 (IHC)                 | Abcam                       |
| 8           | Fibronectin                 | ab2413<br>rabbit polyclonal        | 1:200 (IHC)                 | Abcam                       |

|    |                                       |                               |             |                             |
|----|---------------------------------------|-------------------------------|-------------|-----------------------------|
| 9  | PGC1 $\alpha$                         | ab191838<br>rabbit polyclonal | 1:500 (WB)  | Abcam                       |
| 10 | Anti-rabbit HRP<br>secondary antibody | 7074S                         | 1:5000 (WB) | Cell signaling              |
| 11 | Anti-mouse HRP<br>secondary antibody  | Sc-2005                       | 1:5000 (WB) | Santa Cruz<br>Biotechnology |

**Table S2. Substrates used in respirometry in frozen kidney samples.**

| <b>Port</b> | <b>Substrate/Inhibitor</b>              | <b>Final Concentration<br/>in the Well (1X)</b> | <b>Concentration<br/>Loaded in the<br/>Port (10X)</b> |
|-------------|-----------------------------------------|-------------------------------------------------|-------------------------------------------------------|
| <b>A</b>    | NADH                                    | 1 mM                                            | 10 mM                                                 |
| <b>B</b>    | Rotenone (Rot)<br>+<br>Antimycin A (AA) | 2 $\mu$ M (Rot)<br>+<br>4 $\mu$ M (AA)          | 20 $\mu$ M (Rot)<br>+<br>40 $\mu$ M (AA)              |
| <b>C</b>    | TMPD + Ascorbate                        | 0.5 mM TMPD + 1 mM<br>Ascorbate                 | 5 mM TMPD in<br>10 mM Ascorbate                       |
| <b>D</b>    | Sodium Azide                            | 50 mM                                           | 500 mM                                                |

Oxygen consumption rate was measured in renal cortical mitochondria as described in Methods section by addition of electron donors specific for complex I (NADH), complex IV (TMPD+ascorbate), and inhibitors for complex I (Rot), complex III (AA), and complex IV (Azide) to the injection port of assay plate of Agilent Seahorse XFe96 analyzer. Rot, rotenone; AA, antimycin A; TMPD, tetramethyl-p-phenylenediamine.
